# Supplementary material
Source: Springer Nature journal article supplement (https://www.springermedizin.de/resource/supplementary/12911_2004_58_MOESM1_ESM.pdf/9527112)
Supplement: MOESM1 [file 9527112]

3400 hits from searches

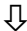

155 mention the condition  
and the intervention(s)

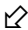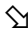

77 provide qualitative  
information about  
effects

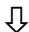

26 unclear  
15 not consistent with  
review

36 consistent with review\*

15 provide quantitative  
information about  
effects

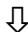

4 Cochrane review  
abstract  
9 incomplete and  
potentially misleading  
1 consistent with review  
but incomplete  
1 consistent with review

\*Only four of these mention a comparison and only four indicate the when the effect occurred or the duration of the effect.
